# Supplementary material for: Comparison of Strategies to Detect Epistasis from eQTL Data
Source: PLOS journal article supplement (doi:10.1371/journal.pone.0028415), 2011-12-19

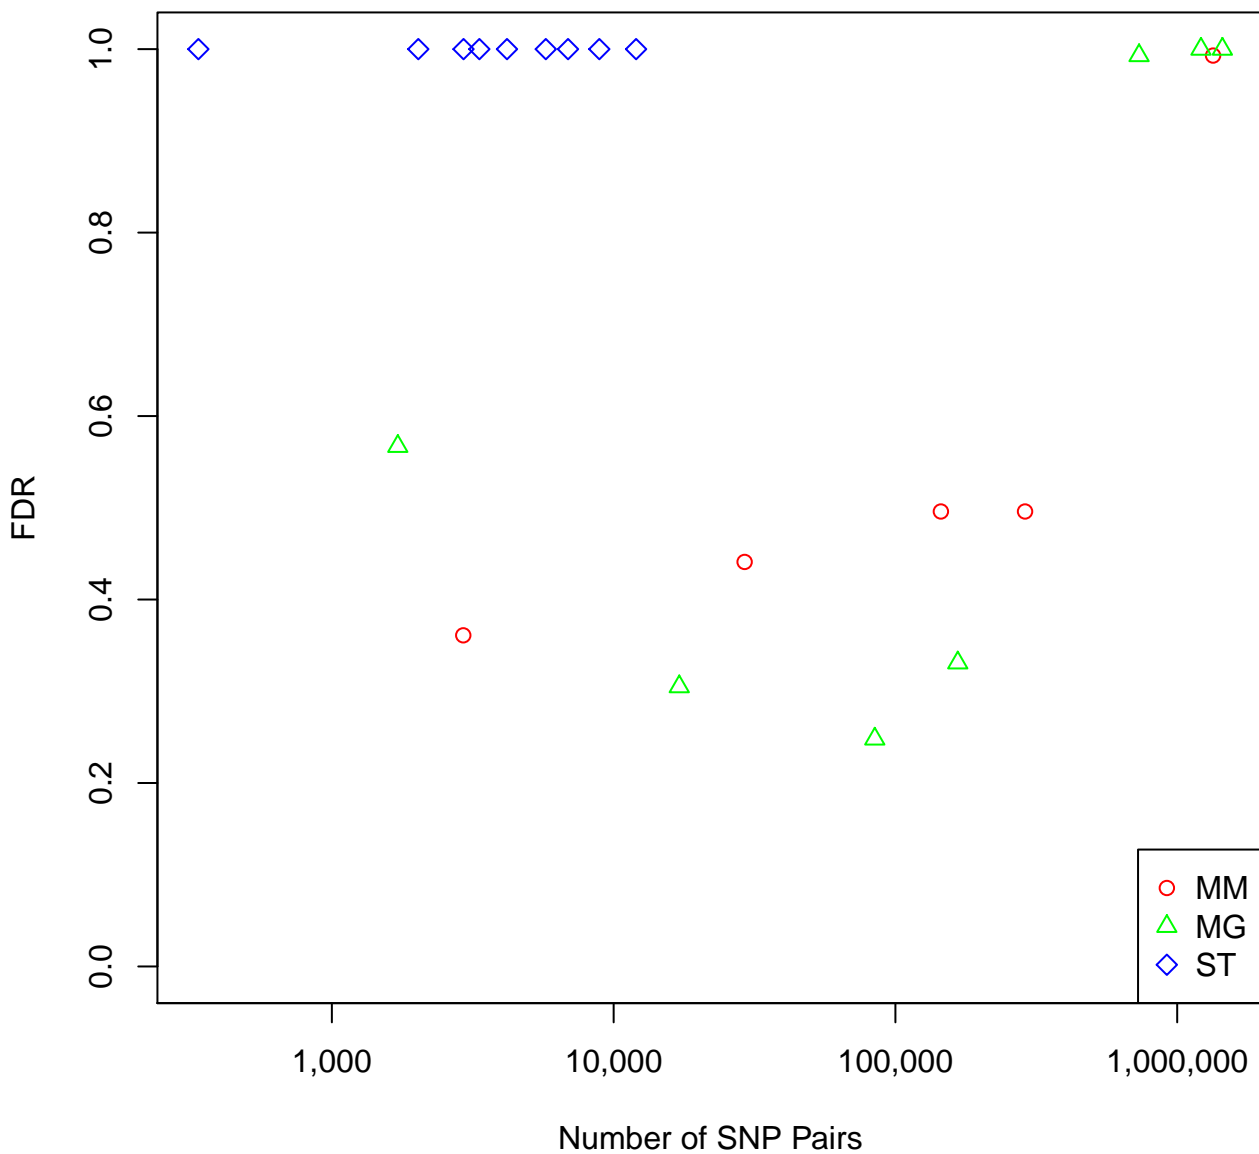

Supplement: S5 (10.1371/journal.pone.0028415.s005) [file journal.pone.0028415.s005]
